# Supplementary material for: Scaffold-mediated gating of Cdc42 signalling flux
Source: eLife. 2017 Mar 17;6:e25257. doi: 10.7554/eLife.25257 (PMC5386590; doi:10.7554/eLife.25257)
Supplement: Figure 1—figure supplement 1—source data 1. — DOI: http://dx.doi.org/10.7554/eLife.25257.005 [file elife-25257-fig1-figsupp1-data1.xlsx]

## Sheet: Fig 1 Sup. 1E
kobs (s-1)
30 nM Cdc24	30 nM Cdc24 + 5 µM Bem1	30 nM Cdc24 + 5 µM Bem1ΔPB1	30 nM Cdc24 + 5 µM Bem1-PB1
0.001185	0.002269	0.001205	0.0009513
0.001156	0.002064	0.0009913	0.00125
0.001339	0.002165	0.001362	0.00115
		0.001155
