# Supplementary material for: Scaffold-mediated gating of Cdc42 signalling flux
Source: eLife. 2017 Mar 17;6:e25257. doi: 10.7554/eLife.25257 (PMC5386590; doi:10.7554/eLife.25257)
Supplement: Figure 1—source data 1. — DOI: http://dx.doi.org/10.7554/eLife.25257.003 [file elife-25257-fig1-data1.xlsx]

## Sheet: Fig 1B
kobs (s-1)
60 nM Cdc24	60 nM Cdc24 + 0.2 µM Bem1	60 nM Cdc24 + 3 µM Bem1	60 nM Cdc24 + 5 µM Bem1
0.0009372	0.001482	0.001991	0.002501
0.001292	0.001439	0.001822	0.002442
0.00106	0.001321	0.001615	0.002563
0.001162			0.002299
0.001109			0.002344
			0.002284
			0.002409

## Sheet: Fig 1E
kobs (s-1)
30 nM Cdc24	30 nM Cdc24 + 300 pM Cla4 + 1µM ATP	30 nM Cdc24 + 0.2 µM Bem1 + 300 pM Cla4 + 1µM ATP	30 nM Cdc24 + additional 5 µM Bem1	30 nM Cdc24 + 300 pM Cla4 + additional 5 µM Bem1	30 nM Cdc24 + 300 pM Cla4 + 1 µM ATP + additional 5 µM Bem1	30 nM Cdc24 + 0.2 µM Bem1 + 300 pM Cla4 + additional 5 µM Bem1	30 nM Cdc24 + 0.2 µM Bem1 + 300 pM Cla4 + 1 µM ATP + additional 5 µM Bem1
0.00106	0.001215	0.001071	0.002501	0.003061	0.001617	0.002569	0.001247
0.001162	0.001152	0.000985	0.002442	0.002299	0.001418	0.002406	0.001224
0.001109	0.001117	0.001046	0.002563	0.002344	0.001509	0.002499	0.00134
