# Supplementary material for: Scaffold-mediated gating of Cdc42 signalling flux
Source: eLife. 2017 Mar 17;6:e25257. doi: 10.7554/eLife.25257 (PMC5386590; doi:10.7554/eLife.25257)
Supplement: Figure 2—figure supplement 1—source data 1. — This is the source data for Figure 2—figure supplement 1E. DOI: http://dx.doi.org/10.7554/eLife.25257.008 [file elife-25257-fig2-figsupp1-data1.xlsx]

## Sheet: Fig 2 Sup 1E
Budding (% cells)											Budding (% cells)
Time (min)	CDC24-3xHA			cdc24-46A-3xHA			cdc24-28D-3xHA				Time (min)	CDC24-3xHA	cdc24-46A-3xHA	cdc24-28D-3xHA
0	0	5.88235	2	0	2	0	8.17	9.83607	6.19469		0	4.7619	2.43902	3.84615
15	1.9	9.40171	7.75862	1.3	2.38095	0.980392	13.08	13.0841	8.51064		15	11.8483	3.73832	7.89474
30	4.98	9.6	10.5263	5.09	6.25	0.8	12.96	16.129	8.10811		30	23.301	12.8079	6.89655
45	15.2	20.8633	12.605	2.95	6.36364	3.77359	18.94	20	10.4762		45	54.1284	44.8781	25
60	62.25	56.4815	55.2	30.5	36.9748	45	26.11	20.5882	17.3913		60	82.8431	79.2627	45.933
75	92.83	90.2913	87.3016	68.35	65.8915	70.7317	34.12	44.5455	34.3949		75	92.5	87.5556	73.43
90	98.5	89.4231	90.0901	95.08	78.0488	79.2857	66	44.6808	52.8986		90	94.1176	89.8618	83.0918
120	99.5	96.2617	95.0495	98.18	95.5224	92.437	85	66.4179	60.6299		120	96.4445	94.3662	93.7198
140		88.4615	84.6939		82.4561	86.4078		70.3125	80.12
