# Supplementary material for: Scaffold-mediated gating of Cdc42 signalling flux
Source: eLife. 2017 Mar 17;6:e25257. doi: 10.7554/eLife.25257 (PMC5386590; doi:10.7554/eLife.25257)
Supplement: Figure 3—figure supplement 1—source data 1. — DOI: http://dx.doi.org/10.7554/eLife.25257.012 [file elife-25257-fig3-figsupp1-data1.xlsx]

## Sheet: Fig 3 Sup. 1D
Relative band intensity
Cdc24-6xHis	cdc24-46A-6xHis	cdc24-28D-6xHis
1.2846	0.835783	0.876835
0.96494	0.765896	0.762843
0.750463	0.530277	0.623106
