# Supplementary material for: Scaffold-mediated gating of Cdc42 signalling flux
Source: eLife. 2017 Mar 17;6:e25257. doi: 10.7554/eLife.25257 (PMC5386590; doi:10.7554/eLife.25257)
Supplement: Figure 3—source data 1. — DOI: http://dx.doi.org/10.7554/eLife.25257.010 [file elife-25257-fig3-data1.xlsx]

## Sheet: Fig 3B
Normalized Cdc24-mEOS intensity at the pole
CDC24	cdc24-46A	cdc24-28D
0.879688	1.29111	0.649691
0.685287	0.873267	0.677754
0.625233	1.19608	0.489852
0.844	1.55389	0.662651
0.559809	0.970867	0.723891
0.585859	0.750508	0.498685
0.566646	1.24846	0.334924
0.798548	0.803994	1.01938
0.672472	1.35222	0.293619
0.662287	1.27728	0.529086
0.547111	0.811181	0.234582
0.862629	1.29452	0.586795
0.769552	0.954821	0.413232
0.808668	1.31625	1.10882
0.529736	1.45979	0.797307
0.589041	1.63604	0.325447
0.426146	1.10788	0.595789
0.433243	1.38978	0.749853
0.422877	1.17962	0.399073
1.08588	0.970776	0.179755
1.10821	1.22761	0.136243
0.998394	0.947458	0.275097
0.84466	1.81334	0.276182
0.88253	1.62082	0.209932
1.18282	1.29446	0.258295
0.810532	1.65717	0.179634
0.899175	1.37309	0.665217
0.896179	1.24202	0.617844
0.927354	1.67992	0.327488
0.84727	1.2618	0.365269
0.872596	1.18377	0.663305
0.942114	1.69733	0.590223
1.00224	1.04398	1.0111
0.666196	1.49349	0.876471
0.639665	1.62901	0.885991
0.932292	1.58108	0.868268
1.07038	1.30048	0.553378
0.790104	1.63644	0.309984
0.595948	1.45984	1.11462
0.518116	1.83789	0.817321
0.679331	1.51802	0.68195
0.95542	1.49433	0.20426
0.704214	1.60367	0.169658
0.875564	1.28116	0.943288
0.793263	1.14632	0.723178
1.0638	1.10515	0.538078
0.905597	1.18063	0.561626
1.02582	1.50211	0.454545
	1.35281	0.103243
	1.00961	0.268932
	1.49428	0.483586
	1.38791	0.345427
	1.06762
	1.18599
	1.25351
	1.2298
	1.41979
	1.956
	1.03128
	1.17998
	1.64223
	1.64962
	1.0735
	1.28606
	1.42742
	1.27744

## Sheet: Fig 3C
Normalized mEOS-Cdc42 intensity at the pole
CDC24	cdc24-46A	cdc24-28D
0.192501	0.788097	1.80983
0.303024	0.918705	1.61637
0.319488	0.946609	1.46086
0.355651	0.948067	1.36082
0.365632	1.00233	1.28677
0.376411	1.05708	1.27361
0.396779	1.06172	1.26688
0.453269	1.12801	1.23744
0.463021	1.15259	1.21573
0.475916	1.17773	1.19225
0.519889	1.20016	1.13462
0.526243	1.20555	1.09678
0.52672	1.23271	1.05468
0.530309	1.25598	1.04768
0.537639	1.27495	1.02436
0.542853	1.28374	1.01865
0.544328	1.33257	1.00199
0.548001	1.37192	0.964582
0.618115	1.40609	0.957541
0.633055	1.41165	0.952247
0.653987	1.41714	0.927871
0.695231	1.42229	0.920357
0.715092	1.42931	0.912492
0.736656	1.43261	0.900171
0.751072	1.43754	0.874724
0.771332	1.48418	0.863531
0.784763	1.50165	0.814268
0.788531	1.55021	0.813118
0.79355	1.57443	0.80942
0.80039	1.62256	0.78832
0.802618	1.69232	0.776745
0.827882	1.71627	0.76216
0.850625	1.80741	0.76013
0.876733	1.82908	0.749949
0.885443	1.87853	0.725269
0.904342	1.87873	0.724195
0.908686	1.89291	0.675747
0.948106	1.94368	0.672939
0.961511	1.94481	0.667924
0.972109	1.96306	0.648868
1.05405	1.99933	0.631583
1.07725	2.00128	0.587697
1.09399	2.11418	0.585997
1.1106	2.27524	0.574207
1.11559	2.32722	0.564447
1.14729	2.3557	0.562262
1.15975	2.41742	0.561867
1.17302	2.45924	0.554613
1.20494	2.47627	0.533769
1.23984	2.65115	0.529373
1.35778	2.72049	0.522271
1.54876	2.72935	0.503222
	2.73074	0.496298
	2.74745	0.492871
	2.79494	0.472905
	2.80201	0.447177
	2.80541	0.433323
	2.96081	0.380792
	3.11334	0.377861
	3.21818	0.349007
	3.21867	0.345718
	3.28457

## Sheet: Fig 3D
Normalized gic2-yeGFP intensity at the pole
CDC24	cdc24-46A	cdc24-28D	cdc24-15A	cdc24-15D
0.605929	1.42392	0.070383	0.903729	0.23909
0.627686	1.44476	0.163574	0.932299	0.338612
0.643571	1.44844	0.181126	0.954156	0.353887
0.655327	1.51682	0.184758	0.976156	0.361834
0.714004	1.57057	0.190788	1.04076	0.395532
0.780632	1.58389	0.208506	1.05981	0.410562
0.783767	1.66707	0.210152	1.07976	0.430253
0.820953	1.68447	0.30256	1.0822	0.434557
0.84187	1.71129	0.351057	1.12854	0.43474
0.849291	1.71556	0.376942	1.20121	0.452928
0.856356	1.71678	0.394019	1.2449	0.459608
0.863514	1.76897	0.396748	1.25244	0.463861
0.9041	1.76908	0.402295	1.29161	0.471196
0.908751	1.78061	0.405448	1.30062	0.473216
0.930872	1.83124	0.413915	1.30151	0.477487
0.938713	2.03668	0.451651	1.31327	0.478533
0.939482	2.11932	0.456995	1.32571	0.485327
0.954995	2.22578	0.472722	1.33065	0.515736
0.971239	2.22945	0.494611	1.33248	0.519698
0.975065	2.23001	0.494945	1.34301	0.528613
1.00048	2.43063	0.531039	1.35308	0.528972
1.02101	2.44481	0.57634	1.35645	0.533378
1.03591	1.16952	0.602134	1.35863	0.571731
1.07193	1.32551	0.66319	1.3657	0.571733
1.09713	1.39601	0.679622	1.38666	0.611293
1.09994	1.70012	0.77807	1.4076	0.614514
1.10161	1.92199	0.791514	1.40985	0.621151
1.10815	1.9472	0.87213	1.41602	0.640547
1.14775	2.14009	0.940575	1.43394	0.641829
1.17917	2.14761	1.03596	1.4445	0.745684
1.1799	2.16244	0.34134	1.45628	0.747201
1.21713	2.35123	0.806331	1.45851	0.749791
1.25511	2.59314	0.750708	1.46063	0.75933
1.27928	1.41224	0.235953	1.47277	0.776099
1.34804	1.95949	0.194955	1.47506	0.779918
1.47602	2.09701	0.191461	1.49983	0.794254
1.47863	1.90425	0.641394	1.50039	0.797089
1.57696	1.67568	0.743546	1.51231	0.797637
1.2492	1.90708	0.626081	1.52135	0.798329
1.15942	1.51779	0.355132	1.52654	0.818588
0.691991	1.70078	0.55237	1.53736	0.832841
1.30693	1.7404	0.785591	1.53967	0.857615
1.42504	1.43068	0.199245	1.56184	0.864596
1.37089	2.54324	0.487725	1.61176	0.867755
1.22707	1.81777	0.635637	1.72897	0.87601
0.940357	1.75591	0.372399	1.73289	0.915462
1.09071	2.26844	0.821089	1.74303	0.922042
1.40817	1.78786	0.257673	1.75034	0.958396
1.30355	2.0526	0.324936	1.75711	1.06438
1.21748	1.62618	0.591957	1.76478	1.07512
1.09793	1.64057	0.164404	1.79259	1.10823
1.09497	2.11369	0.237979	1.86034	1.34459

## Sheet: Fig 3E
kobs (s-1)
30 nM Cdc24	30 nM Cdc24 + 5 µM Bem1	30 nM Cdc24-46A	30 nM Cdc24-46A + 5 µM Bem1	30 nM Cdc24-28D	30 nM Cdc24-28D + 5 µM Bem1
0.001185	0.002269	0.001526	0.002639	0.001272	0.001154
0.001156	0.002064	0.0007902	0.003215	0.000997	0.000967
0.001339	0.002165	0.001112	0.002108	0.001095	0.001266
