# Supplementary figures and images for: Scaffold-mediated gating of Cdc42 signalling flux
Source: eLife journal article supplement (doi:10.7554/elife.25257), 2017-03-17

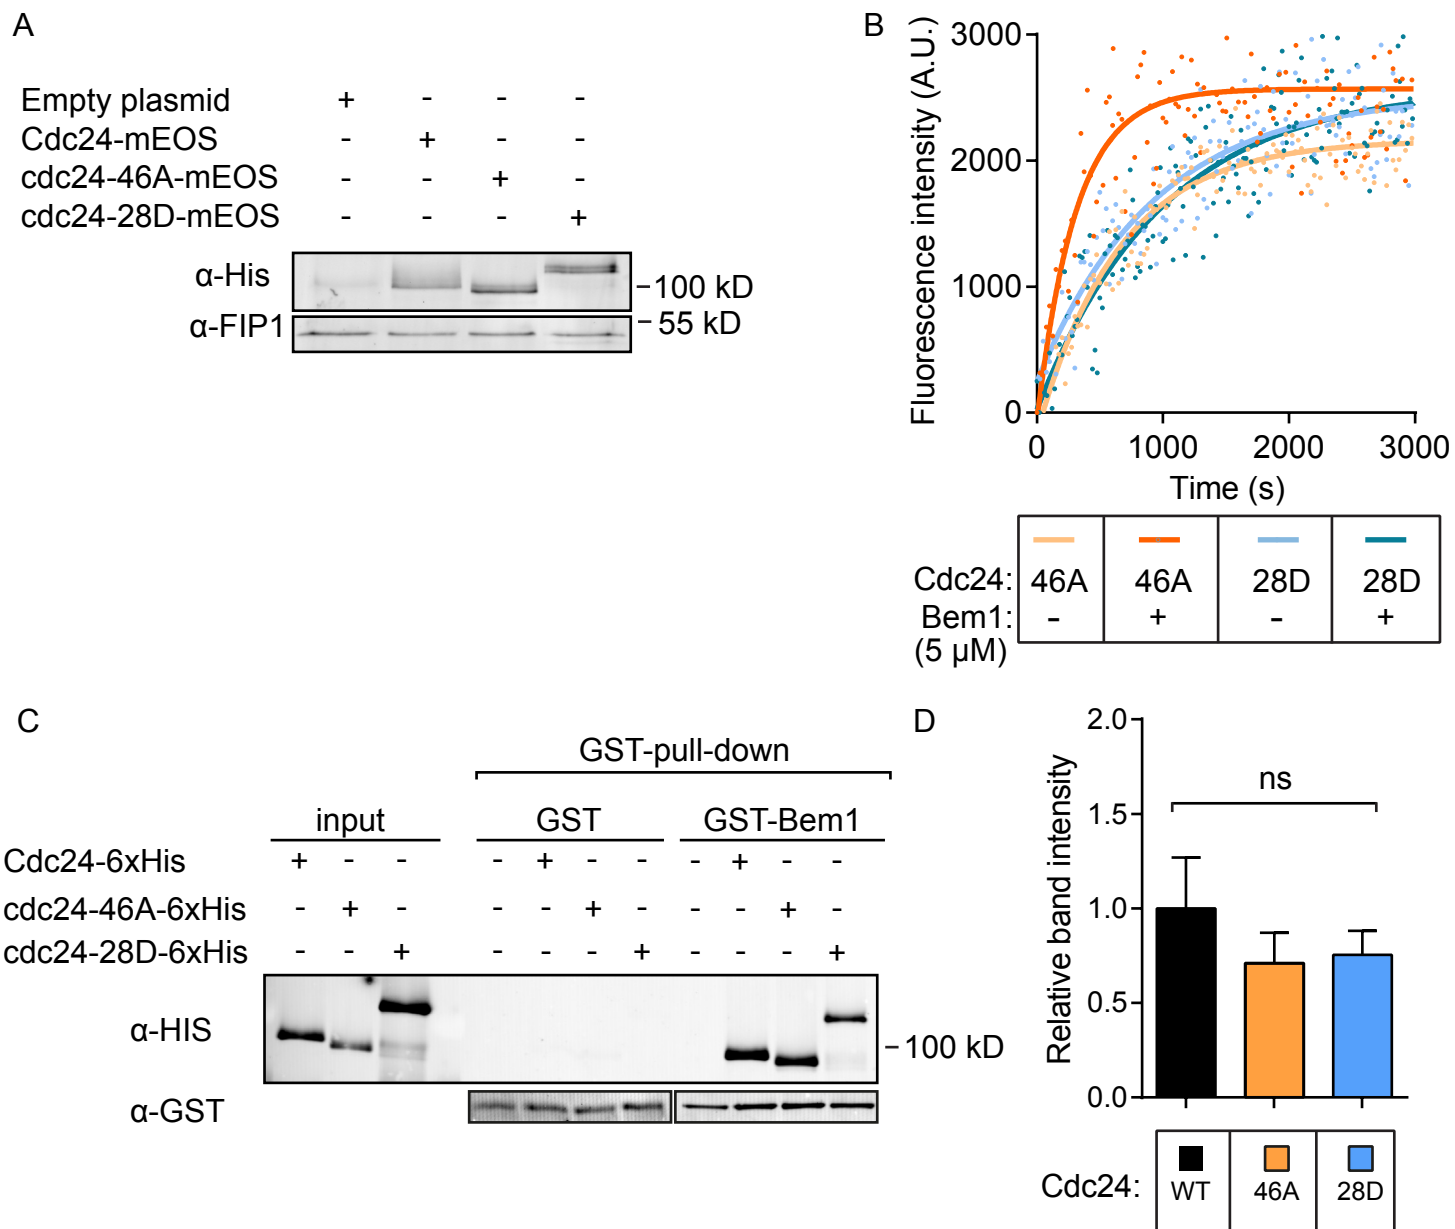

Figure 3- Supplement 1 Rapali *et al.*

Supplement: supp [file elife-25257-supp-v1.zip]

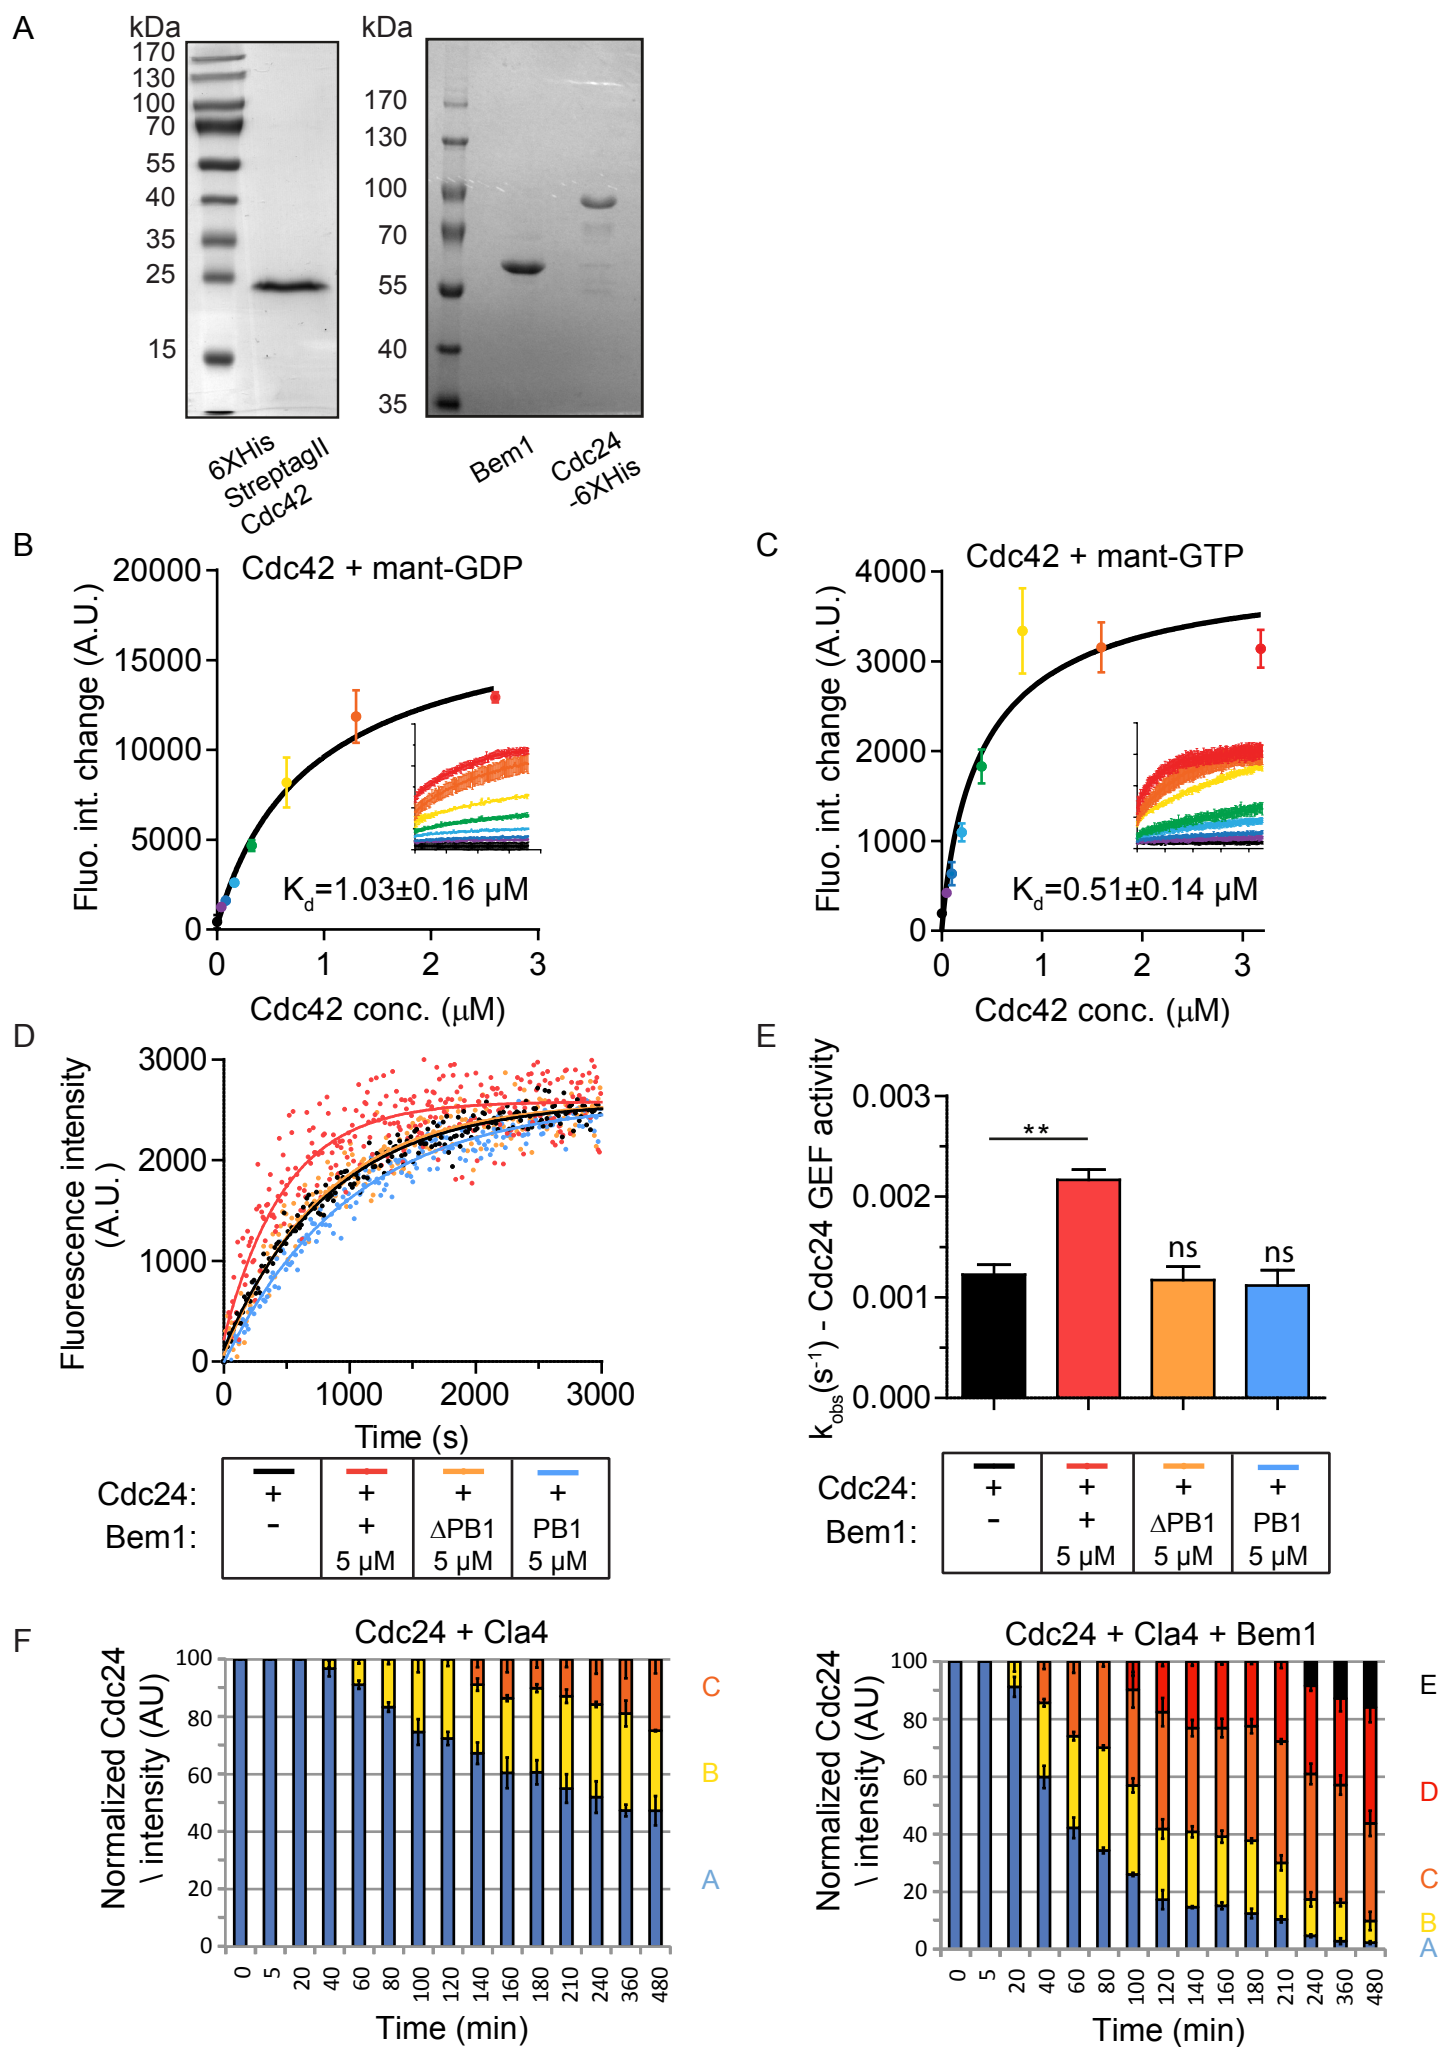

Figure 1 Supplement 1 Rapali *et al.*

Supplement: supp [file elife-25257-supp-v1.zip]

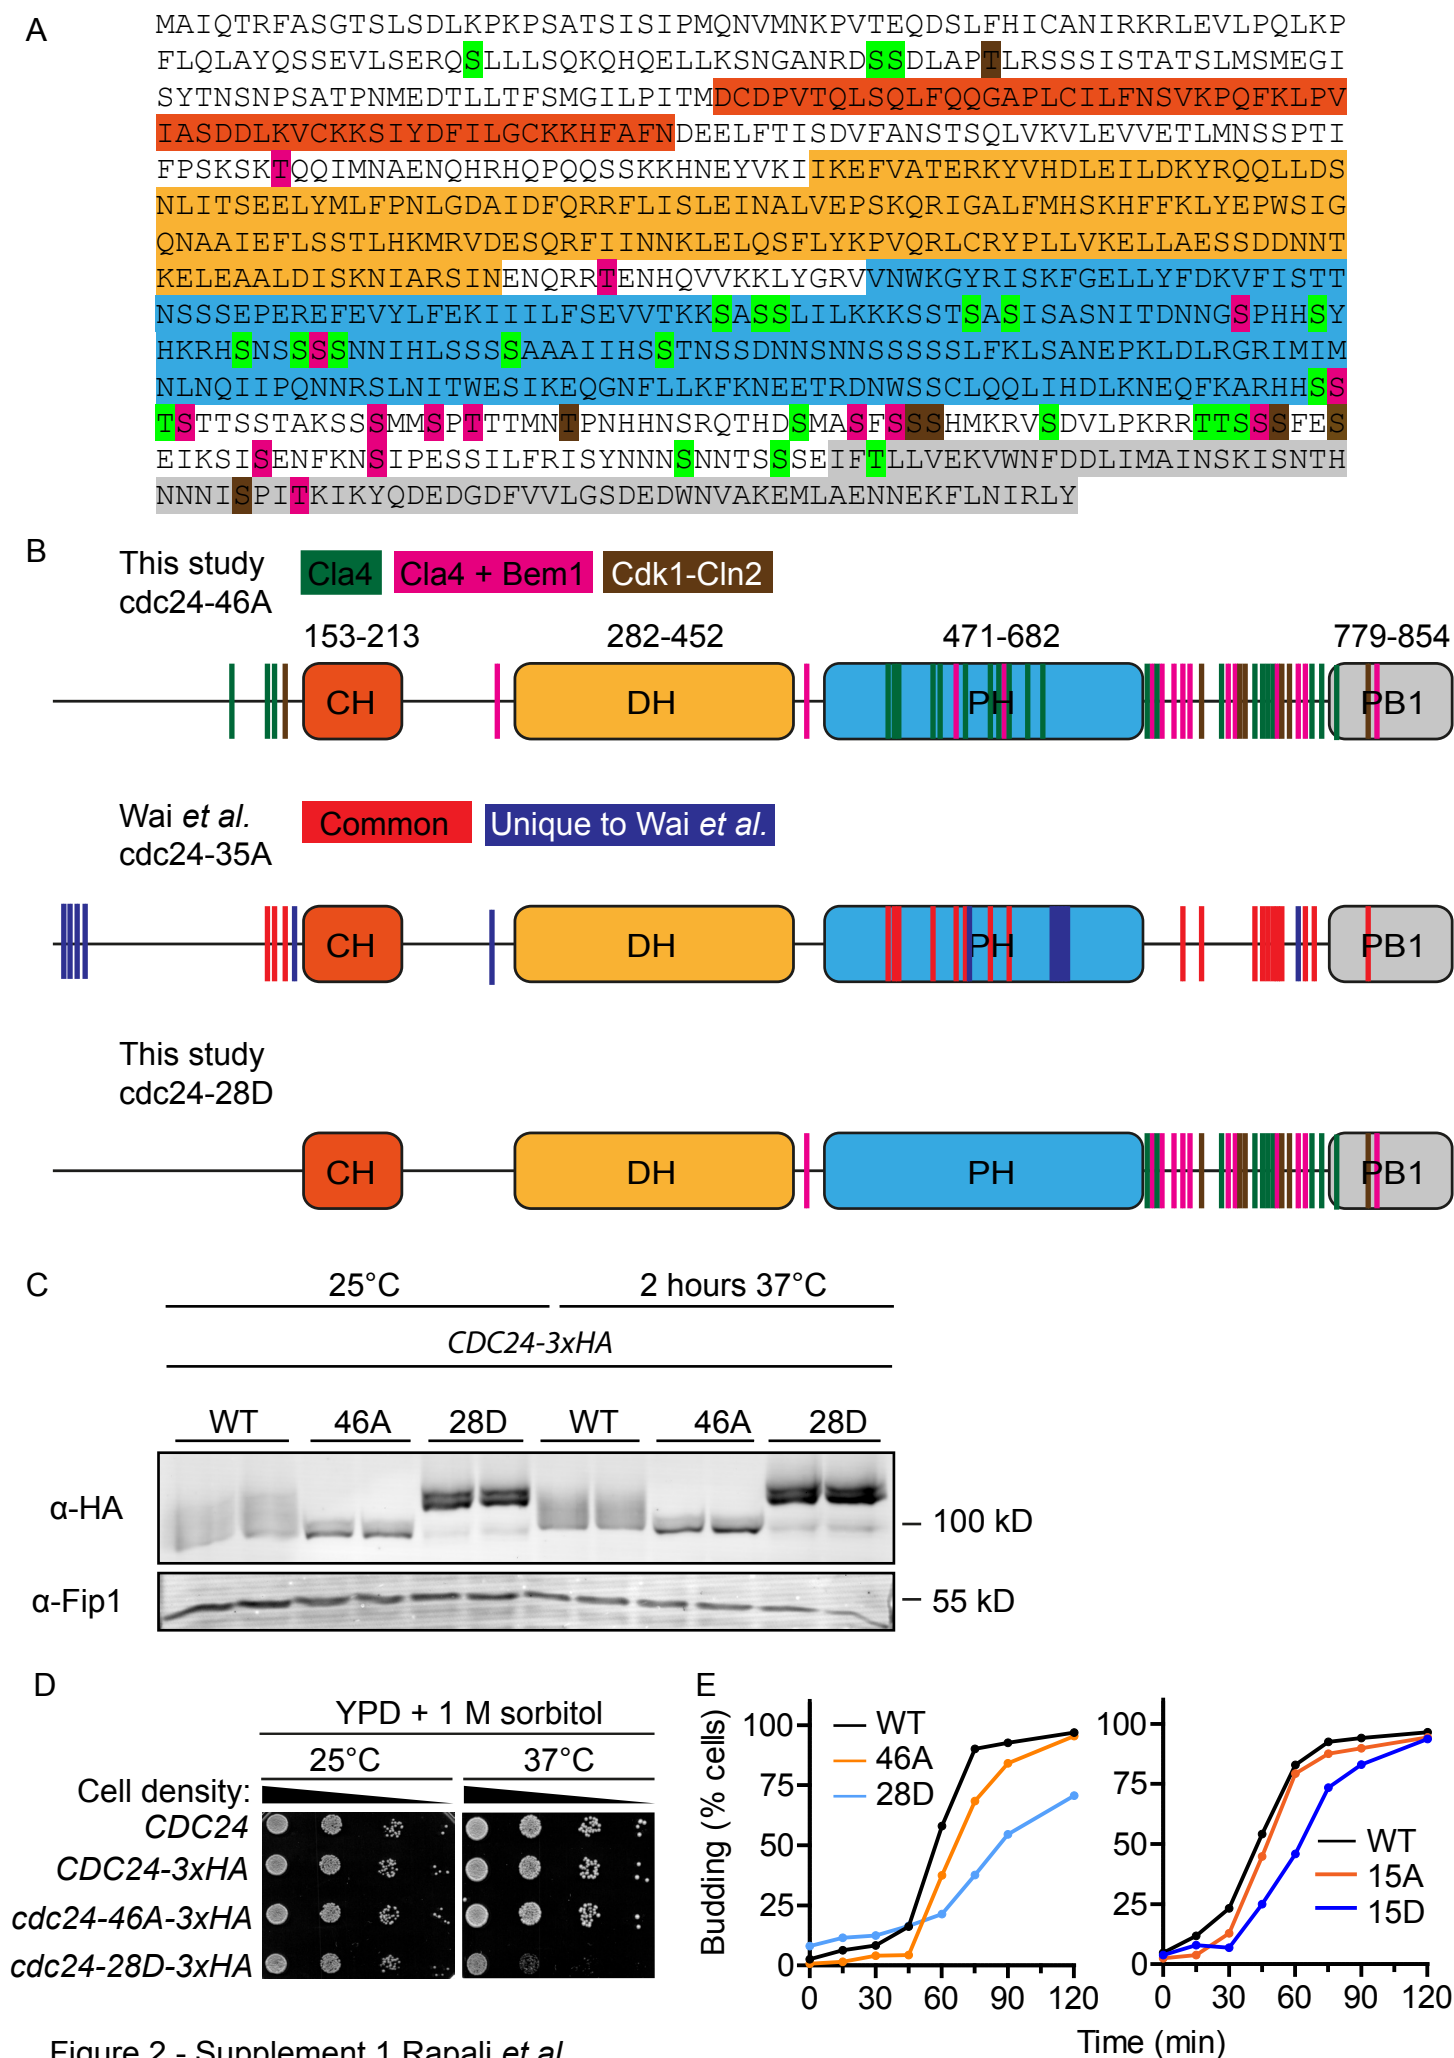

Figure 2 - Supplement 1 Rapali *et al.*

Supplement: supp [file elife-25257-supp-v1.zip]
